# Supplementary material for: Exploring Prospects of Cotton Cultivation under Rainfed Conditions of Pothwar
Source: Research Square preprint supplement (doi:10.21203/rs.3.rs-5336733/v1), 2024-11-28
Supplement: Supplementary file 1 [file f3fcd341faae59c926dd0a2c.pdf]

## APPENDICES

**Appendix 1: ANOVA Table for Crop Growth Rate**

| <b>Source</b>          | <b>DF</b> | <b>SS</b> | <b>MS</b> | <b>F</b> | <b>P</b> |
|------------------------|-----------|-----------|-----------|----------|----------|
| Rep                    | 2         | 0.00034   | 0.00017   |          |          |
| Sowing Dates           | 2         | 0.02101   | 0.01050   | 16.36    | 0.0000   |
| Varieties              | 3         | 0.02353   | 0.00784   | 12.22    | 0.0001   |
| Sowing dates*Varieties | 6         | 0.00222   | 0.00037   | 0.58     | 0.7458   |
| Error                  | 22        | 0.01413   | 0.00064   |          |          |
| Total                  | 35        | 0.06122   |           |          |          |

Grand Mean 0.3222 CV 7.86

**Appendix 2: ANOVA Table for Fiber fineness**

| <b>Source</b>          | <b>DF</b> | <b>SS</b> | <b>MS</b> | <b>F</b> | <b>P</b> |
|------------------------|-----------|-----------|-----------|----------|----------|
| Rep                    | 2         | 0.02882   | 0.01441   |          |          |
| Sowing dates           | 2         | 0.73415   | 0.36707   | 9.96     | 0.0008   |
| Varieties              | 3         | 0.35703   | 0.11901   | 3.23     | 0.0421   |
| Sowing dates*Varieties | 6         | 0.81978   | 0.13663   | 3.71     | 0.0107   |
| Error                  | 22        | 0.81112   | 0.03687   |          |          |
| Total                  | 35        | 2.75090   |           |          |          |

Grand Mean 3.8117 CV 5.04

### Appendix 3: ANOVA Table for Fiber Fineness

| Source                 | DF | SS      | MS      | F     | P      |
|------------------------|----|---------|---------|-------|--------|
| Rep                    | 2  | 1.521   | 0.7603  |       |        |
| Sowing dates           | 2  | 106.234 | 53.1171 | 13.72 | 0.0001 |
| Varieties              | 3  | 100.966 | 33.6553 | 8.69  | 0.0005 |
| Sowing dates*Varieties | 6  | 19.907  | 3.3178  | 0.86  | 0.5411 |
| Error                  | 22 | 85.180  | 3.8718  |       |        |
| Total                  | 35 | 313.808 |         |       |        |

Grand Mean 28.053 CV 7.01

**Appendix 4: ANOVA Table for GOT**

| <b>Source</b>          | <b>DF</b> | <b>SS</b> | <b>MS</b> | <b>F</b> | <b>P</b> |
|------------------------|-----------|-----------|-----------|----------|----------|
| Rep                    | 2         | 0.689     | 0.3444    |          |          |
| Sowing Dates           | 2         | 53.921    | 26.9603   | 10.83    | 0.0005   |
| Varieties              | 3         | 84.998    | 28.3328   | 11.38    | 0.0001   |
| Sowing dates*Varieties | 6         | 4.583     | 0.7639    | 0.31     | 0.9266   |
| Error                  | 22        | 54.774    | 2.4897    |          |          |

---

|       |    |         |
|-------|----|---------|
| Total | 35 | 198.965 |
|-------|----|---------|

---

Grand Mean 36.704 CV 4.30

### Appendix 7: ANOVA Table for Plant Height

| Source                 | DF | SS      | MS      | F     | P      |
|------------------------|----|---------|---------|-------|--------|
| Rep                    | 2  | 1.36    | 0.681   |       |        |
| Sowing dates           | 2  | 800.31  | 400.156 | 23.64 | 0.0000 |
| Varieties              | 3  | 237.12  | 79.040  | 4.67  | 0.0113 |
| Sowing dates*Varieties | 6  | 3.81    | 0.635   | 0.04  | 0.9997 |
| Error                  | 22 | 372.41  | 16.928  |       |        |
| Total                  | 35 | 1415.01 |         |       |        |

Grand Mean 83.083 CV 4.95

**Appendix 8: ANOVA Table for Boll Weight**

| <b>Source</b>          | <b>DF</b> | <b>SS</b> | <b>MS</b> | <b>F</b> | <b>P</b> |
|------------------------|-----------|-----------|-----------|----------|----------|
| Rep                    | 2         | 0.00027   | 0.00014   |          |          |
| Sowing dates           | 2         | 0.00917   | 0.00459   | 15.15    | 0.0001   |
| Varieties              | 3         | 0.02972   | 0.00991   | 32.72    | 0.0000   |
| Sowing dates*Varieties | 6         | 0.00101   | 0.00017   | 0.55     | 0.7621   |
| Error                  | 22        | 0.00666   | 0.00030   |          |          |
| Total                  | 35        | 0.04683   |           |          |          |

Grand Mean 0.2886 CV 6.03

**Appendix 9: ANOVA Table for Fiber Length**

| <b>Source</b>          | <b>DF</b> | <b>SS</b> | <b>MS</b> | <b>F</b> | <b>P</b> |
|------------------------|-----------|-----------|-----------|----------|----------|
| Rep                    | 2         | 5.921     | 2.9605    |          |          |
| Sowing dates           | 2         | 88.940    | 44.4701   | 19.71    | 0.0000   |
| Varieties              | 3         | 146.219   | 48.7397   | 21.60    | 0.0000   |
| Sowing dates*Varieties | 6         | 5.903     | 0.9838    | 0.44     | 0.8469   |
| Error                  | 22        | 49.642    | 2.2564    |          |          |
| Total                  | 35        | 296.625   |           |          |          |

Grand Mean 26.794 CV 5.61

**Appendix 12: ANOVA Table for Lint Yield**

| <b>Source</b>          | <b>DF</b> | <b>SS</b> | <b>MS</b> | <b>F</b> | <b>P</b> |
|------------------------|-----------|-----------|-----------|----------|----------|
| Rep                    | 2         | 227.80    | 113.900   |          |          |
| Sowing dates           | 2         | 754.24    | 377.120   | 2.50     | 0.1053   |
| Varieties              | 3         | 1464.11   | 488.037   | 3.23     | 0.0419   |
| Sowing dates*Varieties | 6         | 255.12    | 42.520    | 0.28     | 0.9395   |
| Error                  | 22        | 3320.89   | 150.949   |          |          |
| Total                  | 35        | 6022.16   |           |          |          |

Grand Mean 243.67 CV 5.04

### Appendix 13: ANOVA Table for Seed Cotton Yield

| Source                 | DF | SS      | MS     | F     | P      |
|------------------------|----|---------|--------|-------|--------|
| Rep                    | 2  | 47396   | 23698  |       |        |
| Sowing dates           | 2  | 1163056 | 581528 | 53.94 | 0.1563 |
| Varieties              | 3  | 1126219 | 375406 | 34.82 | 0.0342 |
| Sowing dates*Varieties | 6  | 1865028 | 310838 | 28.83 | 0.8465 |
| Error                  | 22 | 237200  | 10782  |       |        |
| Total                  | 35 | 4438899 |        |       |        |

Grand Mean 962.24 CV 10.79
